# Supplementary material
Source: PubMed Central journal article supplement (PMC4823817)
Supplement: NIHMS756217-supplement-6_7_8.pdf [file NIHMS756217-supplement-6_7_8.pdf]

**Supplementary Table 6: Primers for qPCR**

| <b>Gene</b>   | <b>Forward</b>         | <b>Reverse</b>             |
|---------------|------------------------|----------------------------|
| <i>ActinB</i> | AAGGCCAACCGTGAAAAGAT   | GTGGTACGACCAGAGGCATAC      |
| <i>Bdnf</i>   | GATGCCGCAAACATGTCTATGA | TAATACTGTCCACACACGCTCAGCTC |
| <i>c-Fos</i>  | GGGAGGACCTTACCTGTTCG   | AGGCCAGATGTGGATGCTT        |
| <i>Egr1</i>   | CCTATGAGCACCTGACCACA   | TCGTTTGGCTGGGATAACTC       |
| <i>FosB</i>   | CGAGAAGAGACACTTACCCCA  | GTTTCCGCCTGAAGTCGATCT      |
| <i>Gad67</i>  | GCTTGTGCCCTCTGGTA      | AGATGGCCTAGATGTGTCAGC      |
| <i>Igf1</i>   | TGGATGCTCTTCAGTTCGTG   | GCAACACTCATCCACAATGC       |
| <i>Nptx2</i>  | AGAGGGTGACTGAGCTGGAG   | CTTCTTGATCTTGCCATACAGGT    |
| <i>Nrn1</i>   | GTTTTGATCATTCCACTGCAC  | CCCACACTCTTGTTGTTTTCG      |
| <i>Npas4</i>  | AGGGTTTGCTGATGAGTTGC   | CCCCTCCACTTCCATCTTC        |
| <i>Pvalb</i>  | GGCAAGATTGGGGTTGAAG    | AGCAGTCAGCGCCACTTAG        |
| <i>Sst</i>    | CAGCTGAGCAGGACGAGAT    | TTGCTGGGTTCGAGTTGG         |
| <i>Tubb3</i>  | CGACAATGAAGCCCTCTACGAC | ATGGTGGCAGACACAAGGTGGTTG   |
| <i>VGlut1</i> | CCCCCAAATCCTTGCACT     | CAAATGGCCACTGAGAAACC       |
| <i>Vip</i>    | AACTACACCCGCCTCAGAAA   | AAAGTCTGCAGAATCTCCCTCA     |

### Supplementary Table 7: Primers used for cloning of riboprobes

Restriction sites used for cloning are underlined

| <b>Gene</b>                     | <b>Forward</b>                         | <b>Reverse</b>                          |
|---------------------------------|----------------------------------------|-----------------------------------------|
| <i>Igfl</i>                     | ACTTCTCGAGGATAAAGATACACATC<br>ATGTCGTC | AGAGGCGGCCGCCTATACTTAGGTTA<br>CATACTAAC |
| <i>Gad67</i><br>( <i>Gad1</i> ) | AGCACTCGAGCTGCTCGTTACAAGTA<br>CTTCC    | AAGCGCGGCCGCCTCTGACATACAG<br>CCTGAG     |
| <i>Pvalb</i>                    | CCAACTCGAGGGATGTCGATGACAGA<br>CGTG     | TCAGGCGGCCGCTCACAGCAAAGTCA<br>AAAGCAA   |
| <i>Sst</i>                      | GTCGCTCGAGCCTGAGGACCTGCGAC<br>TAGA     | AATTGCGGCCGCAGGGTCAAGTTGAG<br>CATCG     |
| <i>Vip</i>                      | ATAACTCGAGACATCAATTTTCCTCGA<br>TTGC    | AGACGCGGCCGCCCTTCCTAGAGCA<br>GAACTTC    |

**Supplementary Table 8: AAV stocks and uses**

| <b>Construct</b>                       | <b>Packaging</b> | <b>Titer</b>               | <b>Produced by</b> | <b>Experiments</b>                                                                           |
|----------------------------------------|------------------|----------------------------|--------------------|----------------------------------------------------------------------------------------------|
| pAAV-shLuc-hUbc-Flex-EGFP              | AAV 2/1          | $1.2 \times 10^{12}$ /ml   | UNC Viral Core     | Sparse infection upon P14/15 injection into visual Ctx                                       |
| pAAV-shIgf1-1-hUbc-Flex-EGFP           | AAV 2/1          | $7.3 \times 10^{11}$ /ml   | UNC Viral Core     | Sparse infection upon P14/15 injection into visual Ctx                                       |
| pAAV-shIgf1-1-hUbc-Flex-EGFP           | AAV 2/1          | $1.4 \times 10^{12}$ /ml   | UNC Viral Core     | Sparse infection upon P14/15 injection into visual Ctx                                       |
| pAAV-shLuc-hUbc-Flex-EGFP              | AAV 2/9          | $1.8 \times 10^{12}$ /ml   | UNC Viral Core     | P3 intracortical injection<br>P18-20 bilateral injections into visual Ctx for MD experiments |
| pAAV-shIgf1-1-hUbc-Flex-EGFP           | AAV 2/9          | $1.4 \times 10^{12}$ /ml   | UNC Viral Core     | P3 intracortical injection<br>P18-20 bilateral injections into visual Ctx for MD experiments |
| pAAV-shIgf1-1-hUbc-Flex-EGFP           | AAV 2/9          | $2.4 \times 10^{12}$ /ml   | UNC Viral Core     | P3 intracortical injection                                                                   |
| pAAV-hUbc-Flex-SSHA Igf1.4Myc-F2A-EGFP | AAV 2/9          | $2.2 \times 10^{15}$ gc/ml | CHB Viral Core     | P3 intracortical injection                                                                   |
| pAAV-hUbc-Flex-F2A-EGFP                | AAV 2/9          | $7.8 \times 10^{14}$ gc/ml | CHB Viral Core     | P3 intracortical injection                                                                   |
